# Supplementary material for: Concerns and Support after One Year of COVID-19 in Austria: A Qualitative Study Using Content Analysis with 1505 Participants
Source: MDPI journal article supplement (doi:10.3390/ijerph18158218), 2021-08-03
Supplement: s1 [file s1]

# Supplementary Materials

Table S1

Table S1: The percentages of the sample for each category for the actual sample (N=1505) and what would be required for representativeness.

| Quota           | Final % | Desired % | Difference in Quotas |
|-----------------|---------|-----------|----------------------|
| Overall         | 100%    | 100%      | 0.00%                |
| Male            | 49.24%  | 49.50%    | -0.26%               |
| Female          | 50.76%  | 50.50%    | 0.26%                |
| Male 18-24      | 4.19%   | 5.50%     | -1.31%               |
| Female 18-24    | 5.98%   | 5.63%     | 0.36%                |
| Male 25-34      | 8.64%   | 9.13%     | -0.49%               |
| Female 25-34    | 9.90%   | 9.31%     | 0.59%                |
| Male 35-44      | 9.50%   | 8.94%     | 0.56%                |
| Female 35-44    | 9.70%   | 9.13%     | 0.58%                |
| Male 45-54      | 11.03%  | 10.81%    | 0.22%                |
| Female 45-54    | 10.63%  | 11.06%    | -0.43%               |
| Male 55-64      | 9.10%   | 8.56%     | 0.54%                |
| Female 55-64    | 8.97%   | 8.69%     | 0.28%                |
| Male 65+        | 6.78%   | 6.38%     | 0.40%                |
| Female 65+      | 5.58%   | 6.56%     | -0.98%               |
| Burgenland      | 3.85%   | 3.63%     | 0.23%                |
| Lower Austria   | 20.27%  | 19.06%    | 1.20%                |
| Wien            | 22.99%  | 23.44%    | -0.45%               |
| Carinthia       | 6.84%   | 6.50%     | 0.34%                |
| Steiermark      | 14.68%  | 14.19%    | 0.50%                |
| Oberoesterreich | 15.08%  | 16.69%    | -1.60%               |
| Salzburg        | 5.25%   | 6.31%     | -1.06%               |
| Tirol           | 7.57%   | 8.50%     | -0.93%               |
| Voralberg       | 3.46%   | 4.44%     | -0.98%               |
| Low Education   | 2.66%   | 2.50%     | 0.16%                |
| Mid Education   | 53.75%  | 50.00%    | 3.75%                |
| High Education  | 43.59%  | 53.06%    | -9.47%               |
